# Supplementary material for: Selective 5-Hydroxymethylfurfural Hydrogenolysis to 2,5-Dimethylfuran over Bimetallic Pt-FeOx/AC Catalysts
Source: MDPI journal article supplement (doi:10.3390/catal11080915), 2021-07-28
Supplement: s1 [file s1]

Supporting information for

# Selective 5-hydroxymethylfurfural hydrogenolysis to 2,5-dimethylfuran over bimetallic Pt-FeO<sub>x</sub>/AC catalysts

*Yongjie Xin*<sup>1</sup>, *Sichan Li*<sup>3</sup>, *Haiyong Wang*<sup>2</sup>, *Lungang Chen*<sup>2</sup>, *Shuang Li*<sup>1,\*</sup>, *Qiyong*

*Liu*<sup>2,\*</sup>

<sup>1</sup> School of Chemical Engineering, Northwest University, Xi'an, Shaanxi 710069,

China

<sup>2</sup> Guangzhou Institute of Energy Conversion, Chinese Academy of Sciences,

Guangzhou 510640, P. R. China

<sup>3</sup> Nano Science and Technology Institute, University of Science and Technology of

China, Suzhou 215123, China

\* Correspondence: [shuangli722@126.com](mailto:shuangli722@126.com); [liuqy@ms.giec.ac.cn](mailto:liuqy@ms.giec.ac.cn)

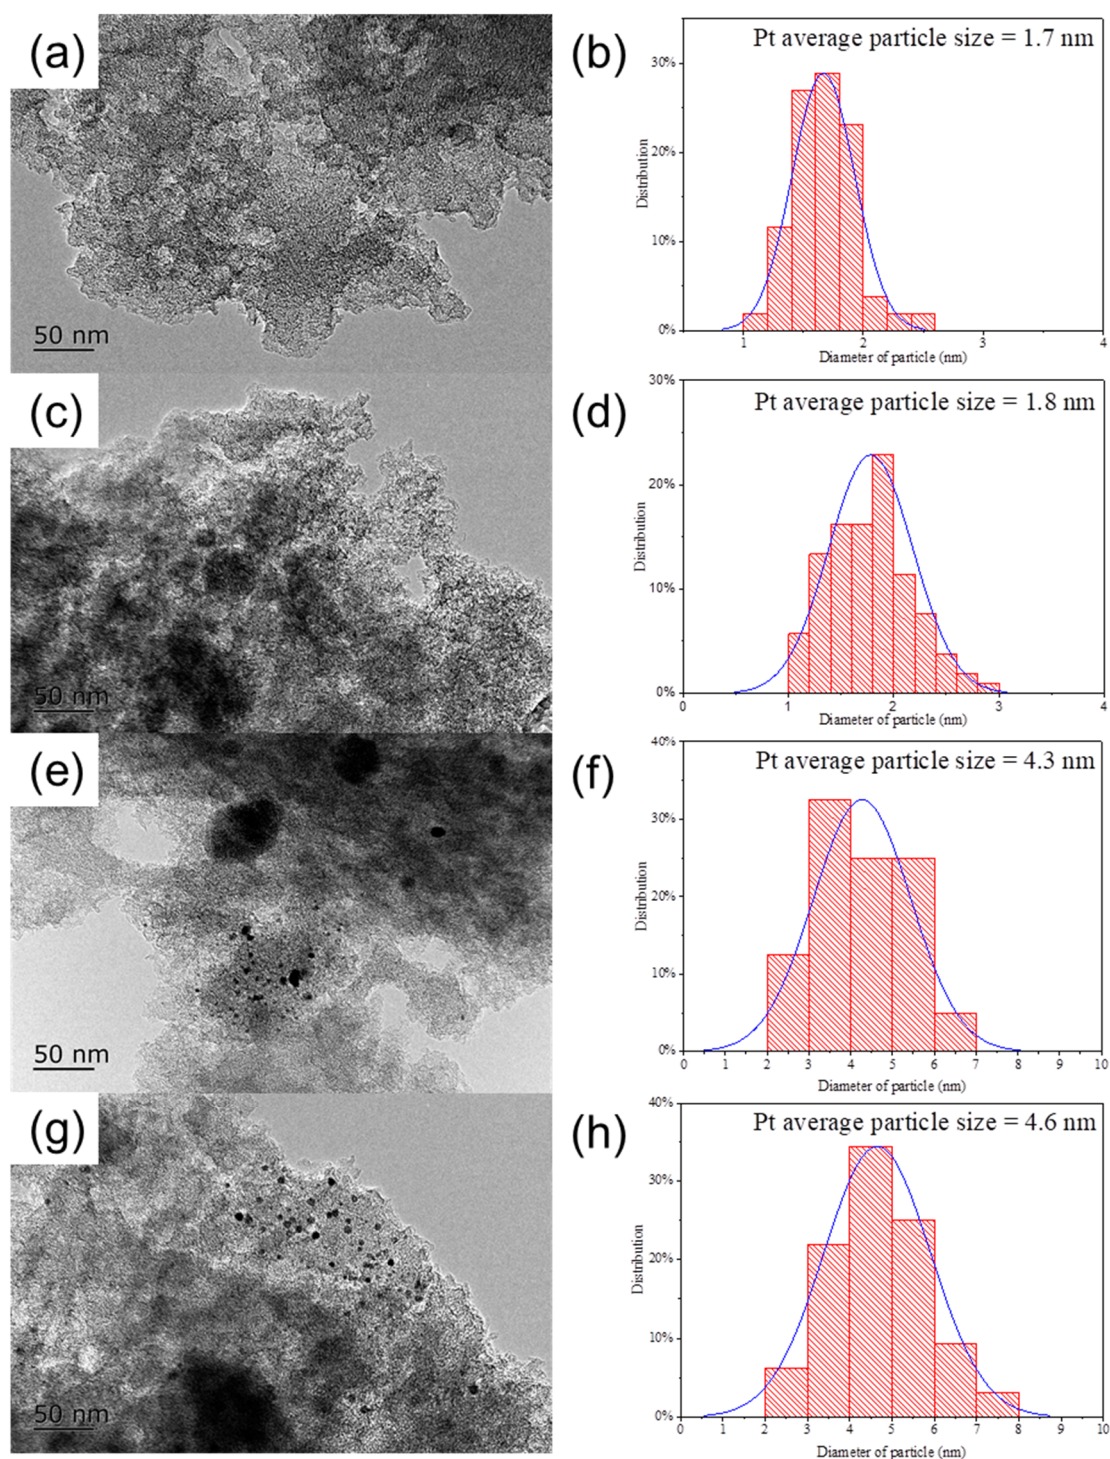

**Figure S1.** TEM images and particle size distribution histogram of 0.1% Pt-2% FeO<sub>x</sub>/AC (a, b), 0.3% Pt-2% FeO<sub>x</sub>/AC (c, d), 0.5% Pt-1% FeO<sub>x</sub>/AC (e, f), 0.5% Pt-5.83% FeO<sub>x</sub>/AC (g, h).

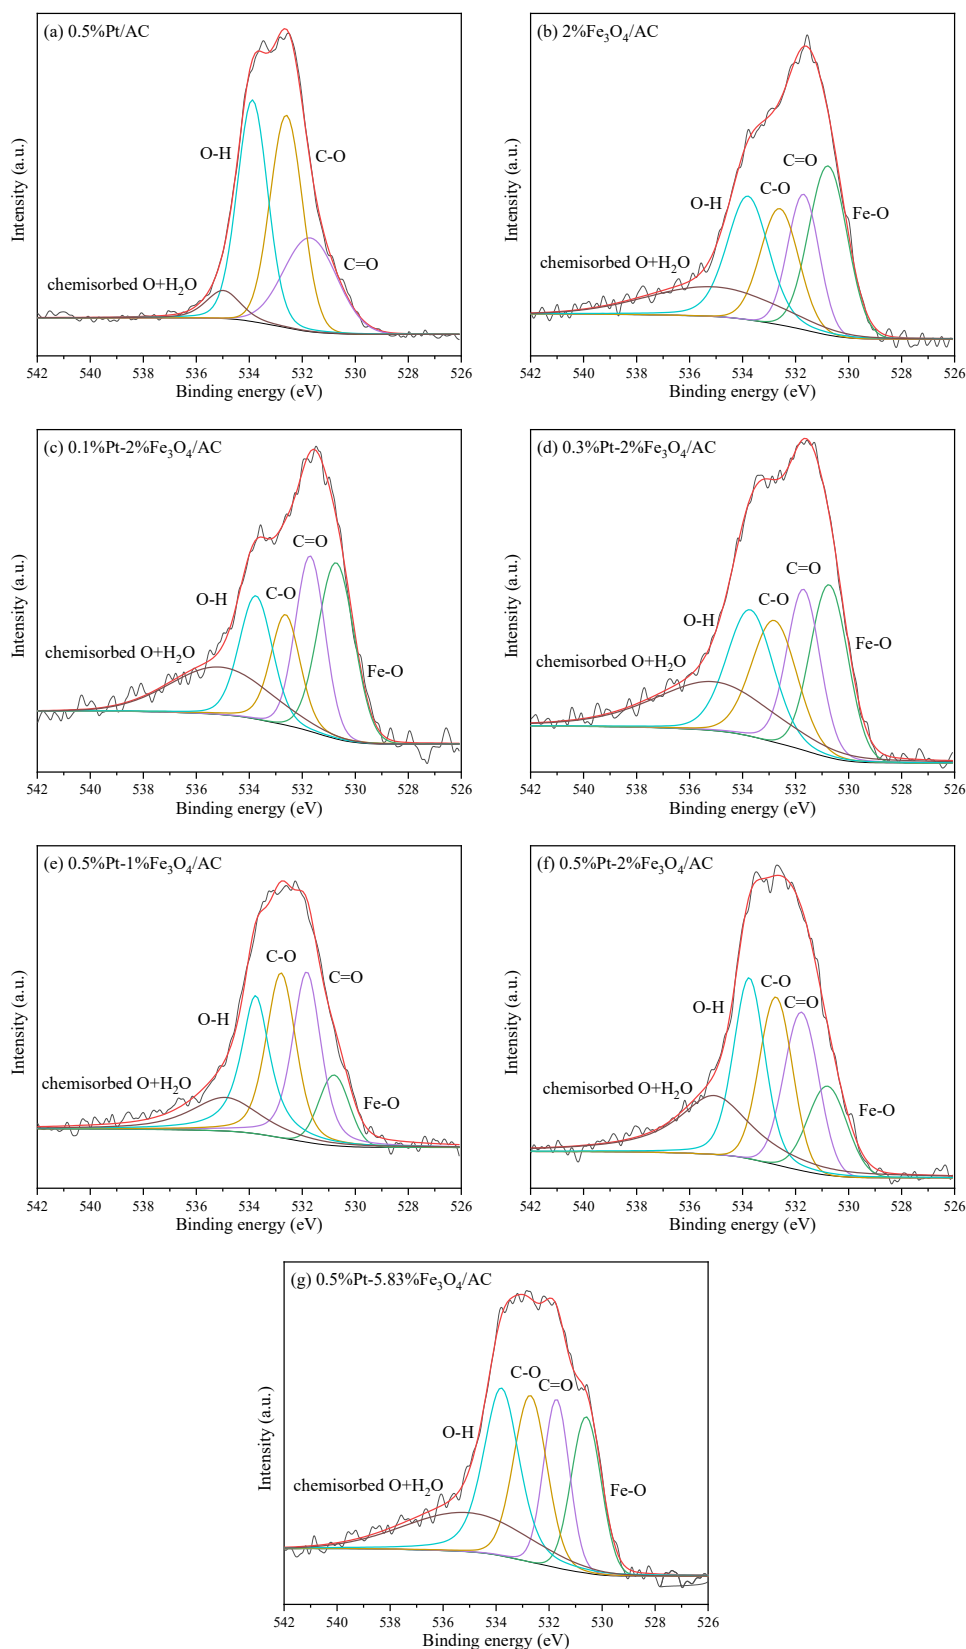

**Figure S2.** The O 1s XPS spectra of different catalysts.

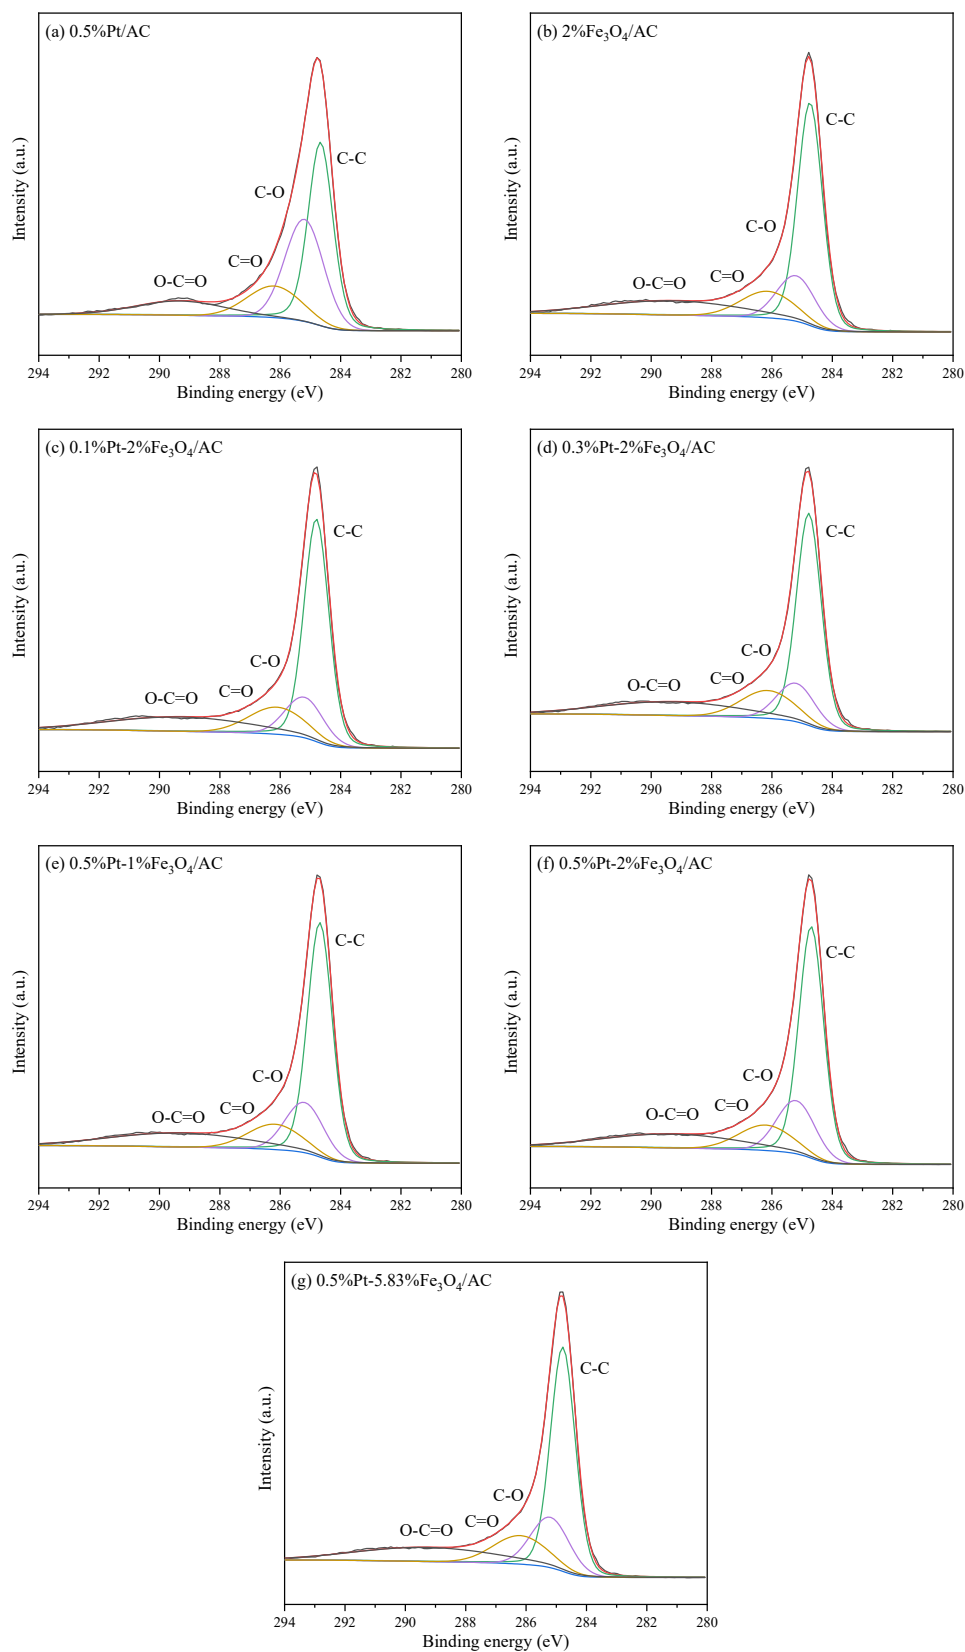

**Figure S3.** The C 1s XPS spectra of different catalysts.

**Table S1.** The O 1s and C 1s XPS peak fitting data of different catalysts.

| catalysts                                 | O 1s  |       |       |       |                                   | C 1s  |       |       |       |
|-------------------------------------------|-------|-------|-------|-------|-----------------------------------|-------|-------|-------|-------|
|                                           | Fe-O  | C=O   | C-O   | O-H   | chemisorbed<br>O+H <sub>2</sub> O | C-C   | C-O   | C=O   | O-C=O |
| 0.5%Pt/AC                                 | -     | 24.5% | 34.4% | 35.4% | 5.7%                              | 42.2% | 32.5% | 14.7% | 10.6% |
| 2%FeO <sub>x</sub> /AC                    | 27.3% | 17.0% | 18.0% | 21.9% | 15.8%                             | 53.0% | 16.3% | 12.8% | 17.9% |
| 0.1%Pt-2%FeO <sub>x</sub> /AC             | 26.1% | 21.7% | 14.8% | 18.0% | 19.4%                             | 52.6% | 15.3% | 13.7% | 18.4% |
| 0.3%Pt-2%FeO <sub>x</sub> /AC             | 20.8% | 18.2% | 18.5% | 20.3% | 22.2%                             | 53.1% | 14.5% | 14.2% | 18.2% |
| 0.5%Pt-1%FeO <sub>x</sub> /AC             | 10.8% | 27.5% | 24.2% | 20.3% | 17.1%                             | 54.2% | 16.6% | 12.2% | 17.1% |
| 0.5%Pt-2%FeO <sub>x</sub> /AC             | 12.8% | 20.2% | 20.3% | 23.4% | 23.3%                             | 53.7% | 18.2% | 11.6% | 16.5% |
| Used-1st<br>0.5%Pt-2%FeO <sub>x</sub> /AC | 6.9%  | 21.0% | 37.9% | 28.5% | 5.7%                              | 52.3% | 17.5% | 18.4% | 11.8% |
| Used-4th<br>0.5%Pt-2%FeO <sub>x</sub> /AC | 1.7%  | 13.9% | 35.2% | 34.9% | 14.3%                             | 41.9% | 24.7% | 23.3% | 10.1% |
| 0.5%Pt-5.83%FeO <sub>x</sub> /AC          | 17.2% | 16.5% | 21.4% | 26.8% | 18.1%                             | 51.8% | 16.4% | 14.0% | 17.7% |

**Table S2.** Reports on the hydrogenation of HMF to DMF over Pt based catalysts.

| Catalyst                           | Catalyst/metal amount             | HMF concentration   | Reaction conditions                 | Solvent                | Conv. (%) | DMF yield (%) | Average reaction rate (mmol·g <sup>-1</sup> ·h <sup>-1</sup> ) | Ref.      |
|------------------------------------|-----------------------------------|---------------------|-------------------------------------|------------------------|-----------|---------------|----------------------------------------------------------------|-----------|
| Pt/C                               | 50mg, 10wt%Pt                     | W/F=50<br>g*min/g   | 180°C,<br>3.3MPa H <sub>2</sub>     | ethanol                | 100%      | 70.0%         | -                                                              | [1]       |
| Pt/rGO                             | 0.02mmol Pt, 5wt%Pt               | 2mmol/12ml          | 120°C, 2h,<br>3MPa H <sub>2</sub>   | n-butanol              | 100%      | 73.2%         | 187.6                                                          | [2]       |
| Pt@MOF-T3                          | 0.02mmol Pt, 10wt%Pt              | 2mmol/12ml          | 140°C, 8h,<br>3MPa H <sub>2</sub> , | n-butanol              | 99.6%     | 96.1%         | 61.6                                                           | [3]       |
| Pt <sub>3</sub> Co <sub>2</sub> /C | 50mg, 10wt%                       | W/F=1.0<br>g*min/mL | 160°C,<br>3.3MPa H <sub>2</sub> ,   | 1-propanol             | 100%      | 98.0%         | 46.4                                                           | [4]       |
| PtCo/GC                            | 50mg, 10wt%Pt,<br>10wt%Co         | 2mmol/45ml          | 180°C, 2h,<br>1MPa H <sub>2</sub> . | commercial<br>gasoline | 100%      | 95.0%         | 95.0                                                           | [5]       |
| PtCo/MWCNTs                        | 4.35 mg Pt, 8.2wt%Pt,<br>6.3wt%Co | 0.4mmol/30 mL       | 160°C, 8h,<br>1MPa H <sub>2</sub>   | n-butanol              | 100%      | 92.3%         | 6.0                                                            | [6]       |
| PtCo@HCS                           | 50mg, 12.0wt%Pt,<br>12.2wt%Co     | 2mmol/6ml           | 180°C, 2h,<br>1MPa H <sub>2</sub>   | n-butanol              | 100%      | 98.0%         | 81.0                                                           | [7]       |
| Pt <sub>1</sub> /Co SAA            | 80mg, 0.001mmol Pt                | 0.5mmol/10ml        | 180°C, 2h,<br>1MPa H <sub>2</sub>   | tetrahydrofuran        | 100%      | 92.9%         | 2.90                                                           | [8]       |
| Pt <sub>3</sub> Co BNN             | 1.3 mg                            | 0.25mmol/2ml        | 160°C, 24h,<br>1MPa H <sub>2</sub>  | ethanol                | 100%      | 78.0%         | 6.25                                                           | [9]       |
| Pt <sub>3</sub> Ni/C               | 50mg, 10wt%                       | W/F=1.0<br>g*min/mL | 200°C,<br>3.3MPa H <sub>2</sub> ,   | 1-propanol             | 100%      | 98.0%         | 46.4                                                           | [10]      |
| PtIr-CMK-3                         | 150mg, 0.5wt%Pt,<br>0.5wt%Ir      | 1.2mmol/50mL        | 120°C, 4h,<br>1.5MPa H <sub>2</sub> | tetrahydrofuran        | 98%       | 86.0%         | 172                                                            | [11]      |
| Pt-FeO <sub>x</sub> /AC            | 100mg, 0.5wt%Pt,<br>2wt%Fe        | 2mmol/20ml          | 180°C, 6h,<br>1.5MPa H <sub>2</sub> | n-butanol              | 100%      | 91.1%         | 121.5                                                          | This work |

Average reaction rate = DMF yield × mmol of HMF / metal mass / reaction time.

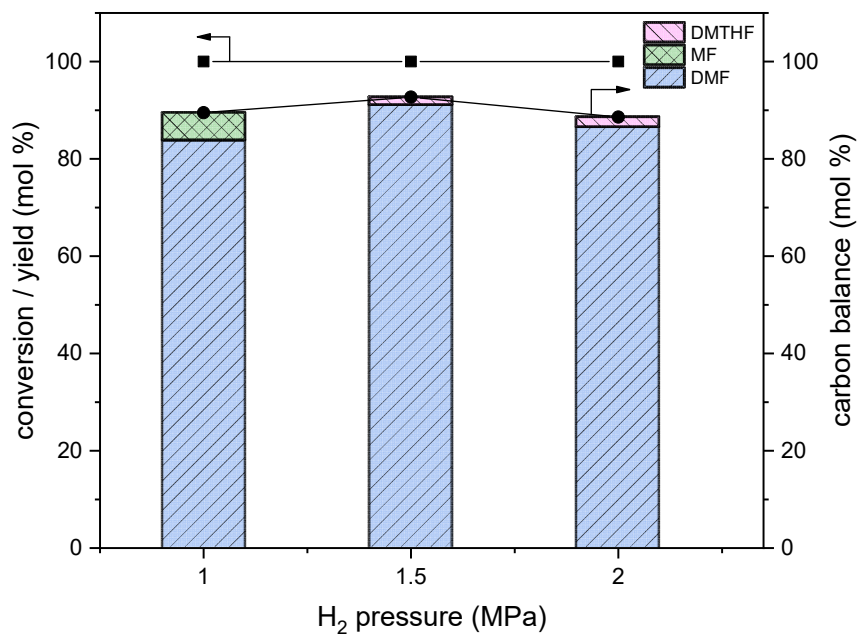

**Figure S4.** Effect of H<sub>2</sub> pressure on HMF hydrogenolysis over 0.5% Pt-2% FeO<sub>x</sub>/AC. [Reaction conditions:  $T = 180\text{ }^{\circ}\text{C}$ ,  $t = 6\text{ h}$ , stirring speed = 600 rpm,  $m_{\text{HMF}} = 250\text{ mg}$ ,  $m_{\text{catalyst}} = 100\text{ mg}$ ,  $V_{\text{n-butanol}} = 20\text{ mL}$ .]

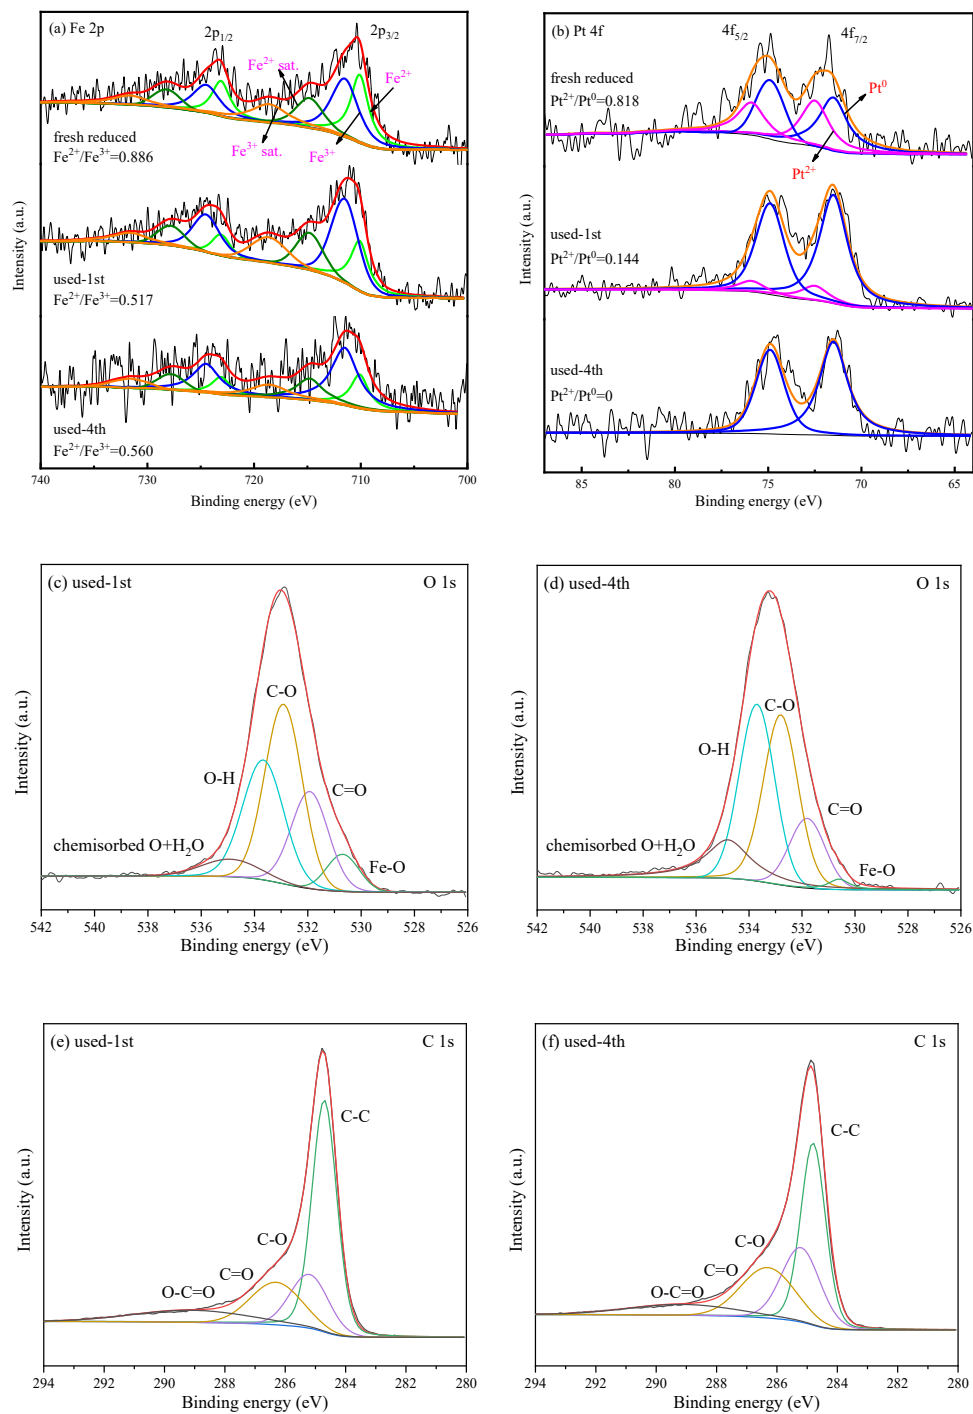

**Figure S5.** The Fe 2p (a), Pt 4f (b), O 1s (c) and C 1s (d-f) XPS spectra of fresh reduced, used-1st and used-4th 0.5% Pt-2% FeO<sub>x</sub>/AC catalyst.



## References

1. Luo, J.; Arroyo-Ramírez, L.; Gorte, R. J.; Tzoulaki, D. and Vlachos, D. G. Hydrodeoxygenation of HMF over Pt/C in a continuous flow reactor. *AIChE J.* **2015**, 61, 590-597.
2. Shi, J.; Wang, Y.; Yu, X.; Du, W. and Hou, Z. Production of 2,5-dimethylfuran from 5-hydroxymethylfurfural over reduced graphene oxides supported Pt catalyst under mild conditions. *Fuel* **2016**, 163, 74-79.
3. Wang, K.; Zhao, W.; Zhang, Q.; Li, H. and Zhang, F. In Situ One-Step Synthesis of Platinum Nanoparticles Supported on Metal–Organic Frameworks as an Effective and Stable Catalyst for Selective Hydrogenation of 5-Hydroxymethylfurfural. *ACS Omega* **2020**, 5, 16183-16188.
4. Luo, J.; Yun, H.; Mironenko, A. V.; Goulas, K.; Lee, J. D.; Monai, M.; Wang, C.; Vorotnikov, V.; Murray, C. B.; Vlachos, D. G.; Fornasiero, P. and Gorte, R. J. Mechanisms for High Selectivity in the Hydrodeoxygenation of 5-Hydroxymethylfurfural over PtCo Nanocrystals. *ACS Catal.* **2016**, 6, 4095-4104.
5. Nürenberg, E.; Schulze, P.; Kohler, F.; Zubel, M.; Pischinger, S. and Schüth, F. Blending Real World Gasoline with Biofuel in a Direct Conversion Process. *ACS Sustain. Chem. Eng.* **2018**, 7, 249-257.
6. Wang, X.; Liu, Y. and Liang, X. Hydrogenolysis of 5-hydroxymethylfurfural to 2,5-dimethylfuran over supported Pt–Co bimetallic catalysts under mild conditions. *Green Chem.* **2018**, 20, 2894-2902.
7. Wang, G.; Hilgert, J.; Richter, F. H.; Wang, F.; Bongard, H. J.; Spliethoff, B.; Weidenthaler, C. and Schüth, F. Platinum–cobalt bimetallic nanoparticles in hollow carbon nanospheres for hydrogenolysis of 5-hydroxymethylfurfural. *Nat. Mater.* **2014**, 13, 293-300.
8. Gan, T.; Liu, Y.; He, Q.; Zhang, H.; He, X. and Ji, H. Facile Synthesis of Kilogram-Scale Co-Alloyed Pt Single-Atom Catalysts via Ball Milling for Hydrodeoxygenation of 5-Hydroxymethylfurfural. *ACS Sustain. Chem. Eng.* **2020**, 8, 8692-8699.
9. Carmiel-Kostan, M.; Nijem, S.; Dery, S.; Horesh, G. and Gross, E. Composition–Reactivity Correlations in Platinum–Cobalt Nanoporous Network as Catalyst for Hydrodeoxygenation of 5-Hydroxymethylfurfural. *J. Phys. Chem. C* **2019**, 123, 30274-30282.
10. Luo, J.; Lee, J. D.; Yun, H.; Wang, C.; Monai, M.; Murray, C. B.; Fornasiero, P. and Gorte, R. J. Base metal-Pt alloys: A general route to high selectivity and stability in the production of biofuels from HMF. *Appl. Catal. B* **2016**, 199, 439-446.
11. Ledesma, B.; Juárez, J.; Mazarío, J.; Domine, M. and Beltramone, A. Bimetallic platinum/iridium modified mesoporous catalysts applied in the hydrogenation of HMF. *Catal. Today* **2019**, 360, 147-156.
